# Supplementary material for: Multiparametric Immunoimaging Maps Inflammatory Signatures in Murine Myocardial Infarction Models
Source: PubMed Central journal article supplement — JACC Basic Transl Sci. 2023 Apr 5;8(7):801–16. doi: 10.1016/j.jacbts.2022.12.014 (PMC10401290; doi:10.1016/j.jacbts.2022.12.014), 2023-04-05

**Supplemental Figure 1. Study protocol and cardiac MRI 6 days after myocardial infarction.** (a) Study protocol for C57BL/6 and *ApoE*<sup>-/-</sup> mice and each imaging modality/tracer. FC = Flow cytometry. (b) Representative LGE cMR images on day 6 after myocardial infarction; arrows indicate LGE area. (c) LGE area in % of the left ventricle 6 days after surgery (n = 9-14, p < 0.001, two-tailed Student's t-test). (d) Left ventricular ejection fraction (LVEF) 6 days after surgery (n = 9-12, p < 0.001 for ctrl vs. PO and IR vs. PO, p = 0.058 for ctrl. vs. IR, one-way ANOVA). Data are presented as mean ± standard error of the mean, unless otherwise specified. Symbols used are specified as \*p < 0.05, \*\*p < 0.01 and \*\*\*p < 0.001.

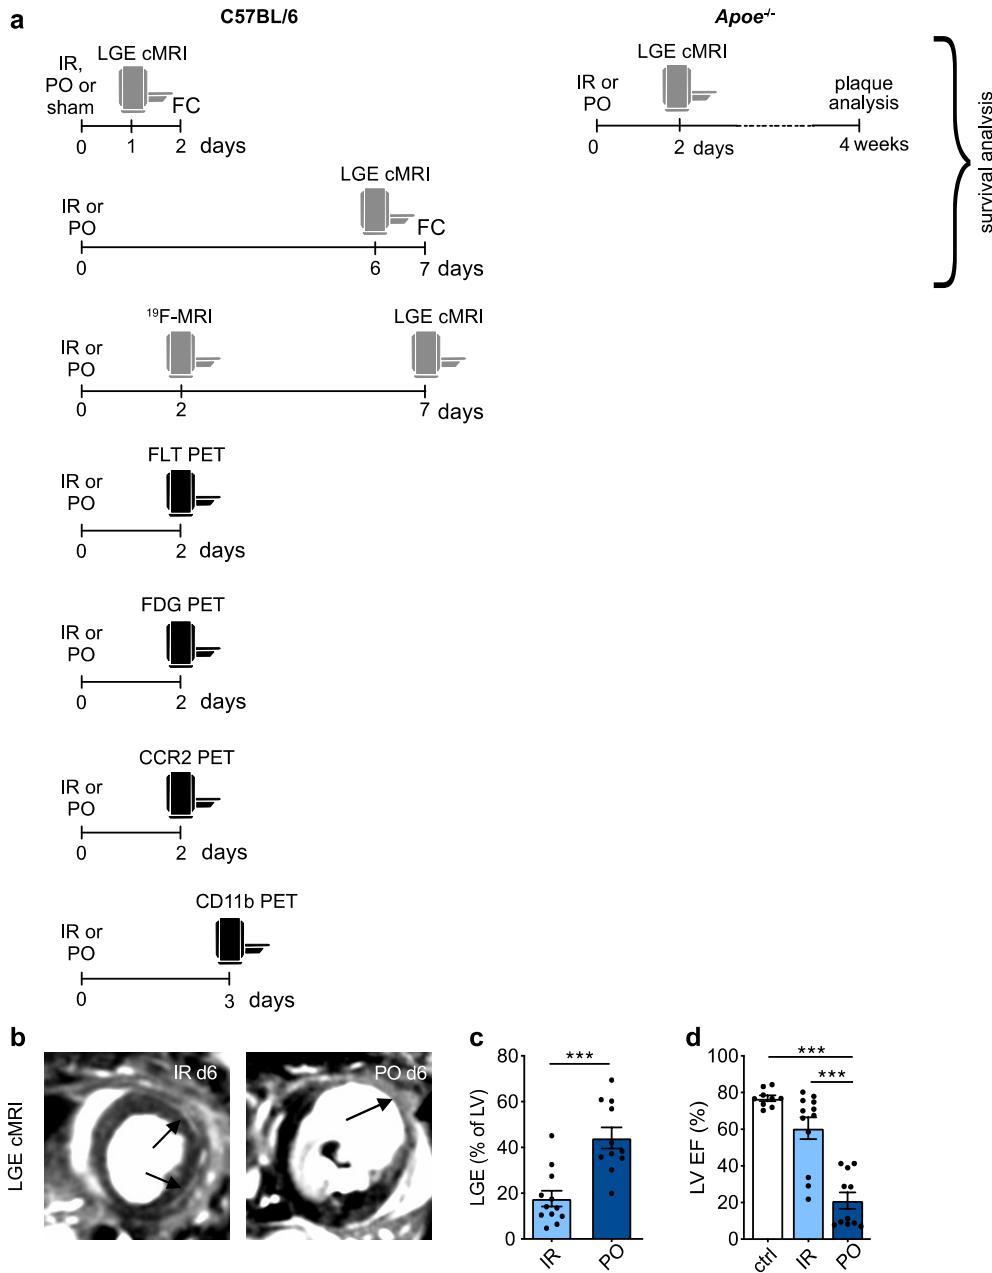

### Supplemental Figure 2. $^{19}\text{F}$ -MRI nanotracer and $^{19}\text{F}$ infarct/LVEF correlations (a)

Components and schematic representation of the PERFECTA nanotracer. The nanotracer consists of PERFECTA, DMPC, MHPC and Apolipoprotein A1. PERFECTA, 1,3-bis[[1,1,1,3,3,3-hexafluoro-2-(trifluoromethyl)propan-2-yl]oxy]-2,2-bis[[1,1,1,3,3,3-hexafluoro-2-(trifluoromethyl)propan-2-yl]oxymethyl]propane; DMPC, 1,2-Dimyristoyl-*sn*-glycero-3-phosphocholine; MHPC, 1-myristoyl-2-hydroxy-*sn*-glycero-3-phosphocholine. (b) PERFECTA target-to-background-ratio (TBR) in the infarct and left ventricular ejection fraction (LVEF) are inversely correlated on day 2 and 7 after IR/PO.

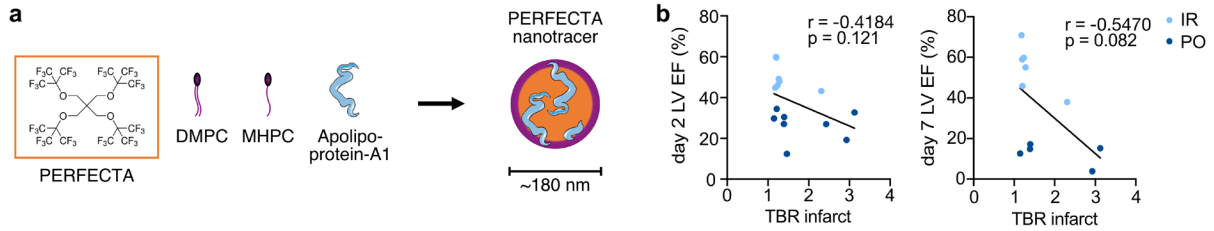

**Supplemental Figure 3. Myeloid cell numbers in the ischemic myocardium and correlation with left ventricle ejection fraction.** (a) The flow cytometry gating strategy used to identify leukocytes in the heart (infarct zone) and aorta. (b) Representative flow cytometry plots of the IR and PO infarct areas 7 days after myocardial infarction. IR upper row, PO lower row. Following CD11b<sup>+</sup>/Ly6G<sup>-</sup> (n = 9-12, p = 0.002 ctrl. vs. IR; p < 0.001 ctrl. vs. PO; p = 0.091 IR vs. PO, Kruskal-Wallis test), neutrophil (n = 9-12, p = 0.007 ctrl. vs. IR; p < 0.001 ctrl. vs. PO; p = 0.12 IR vs. PO, Kruskal-Wallis test), Ly6C<sup>hi</sup> monocytes (n = 9-12, p < 0.001 ctrl. vs. IR; p < 0.001 ctrl. vs. PO; p = 0.28 IR vs. PO, Kruskal-Wallis test) and macrophage numbers (n = 9-12, p = 0.005 ctrl. vs. IR; p < 0.001 ctrl. vs. PO; p = 0.080 IR vs. PO, Kruskal-Wallis test). (c) CD11b<sup>+</sup> cell numbers in the infarct and left ventricular ejection fraction (LVEF) are inversely correlated on day 2 after IR/PO. Data are presented as mean ± standard error of the mean, unless otherwise specified. Symbols used are specified as \*p < 0.05, \*\*p < 0.01 and \*\*\*p < 0.001.

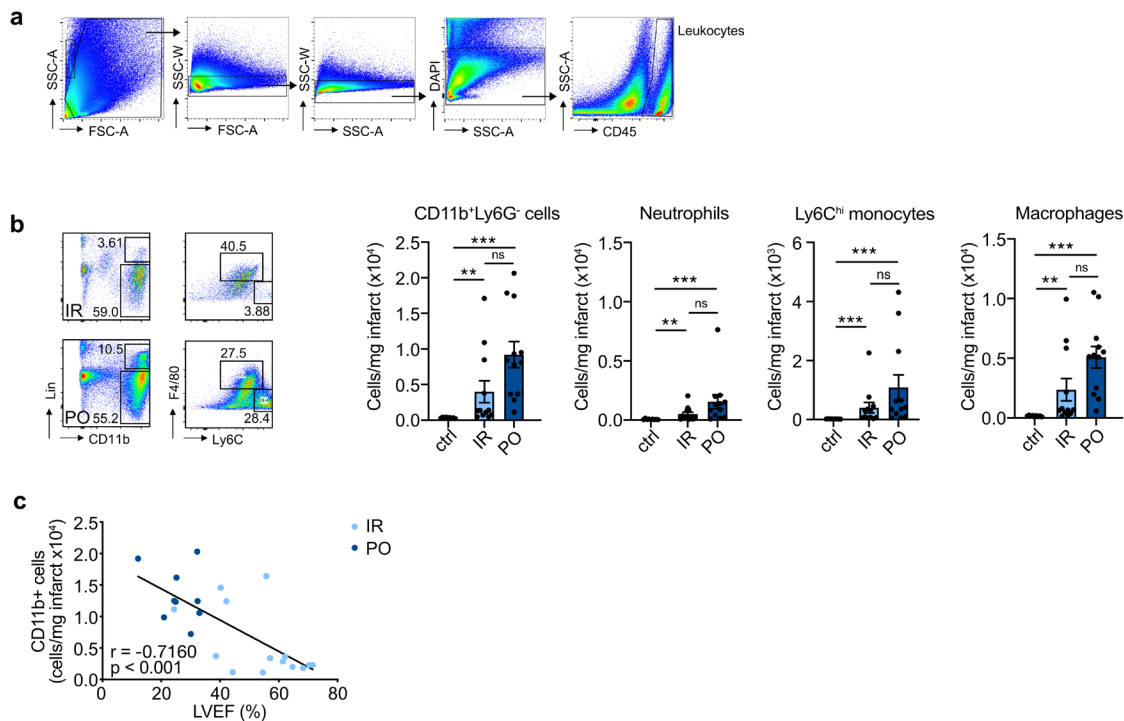

**Supplemental Figure 4. Blood myeloid cell numbers after IR/PO and CCR2 imaging of the bone marrow.** (a) Flow cytometry gating strategy for bone marrow progenitors. (b) Gating strategy for viable cells in the blood. (c) Neutrophils (n = 9-14, p = 0.002 ctrl. vs. IR; p = 0.003 ctrl. vs. PO; p = 0.39 ctrl. vs. sham; p = 0.87 IR vs. PO; p = 0.027 IR vs. sham; p = 0.032 PO vs. sham, Kruskal-Wallis test), Ly6C<sup>hi</sup> monocytes (n = 9-14, p = 0.77 ctrl. vs. IR; p = 0.62 ctrl. vs. PO; p = 0.070 ctrl. vs. sham; p = 0.40 IR vs. PO; p = 0.021 IR vs. sham; p = 0.19 PO vs. sham, Kruskal-Wallis test) and Ly6C<sup>lo</sup> monocytes (n = 9-14, p = 0.13 ctrl. vs. IR; p = 0.16 ctrl. vs. PO; p = 0.81 ctrl. vs. sham; p = 0.96 IR vs. PO; p = 0.076 IR vs. sham; p = 0.098 PO vs. sham, Kruskal-Wallis test) in the blood 2 days after myocardial infarction compared to naïve controls and sham controls. (d) <sup>64</sup>Cu-DOTA-ECL1i PET/CT of the bone marrow was performed 2 days after IR/PO surgery. The scan was conducted during the first 60 minutes after injection. (e) Quantification of <sup>64</sup>Cu-DOTA-ECL1i signal in the lumbar vertebrae and representative CCR2 PET images. The CCR2 tracer bone marrow signal did not show significant differences between mice with IR/PO and controls (n = 7 – 9, p = 0.58 ctrl. vs. IR; p = 0.54 ctrl. vs. PO; p = 0.98 IR vs. PO, Kruskal-Wallis test). (f) *Ex vivo* gamma counting of CCR2 tracer uptake in the bone marrow (n = 7, p = 0.12 ctrl. vs. IR; p = 0.070 ctrl. vs. PO; p = 0.80 IR vs. PO, Kruskal-Wallis test). Data are presented as mean ± standard error of the mean, unless otherwise specified. Symbols used are specified as \*p < 0.05, \*\*p < 0.01 and \*\*\*p < 0.001.

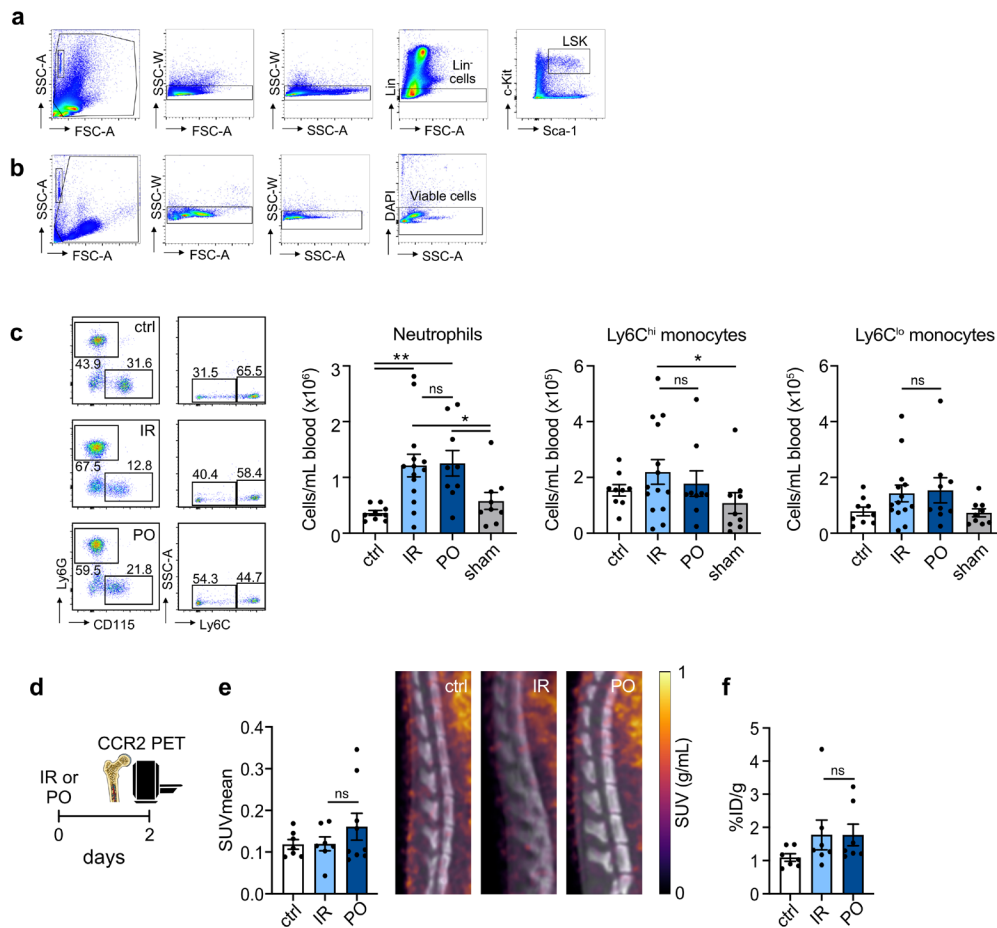

**Supplemental Figure 5. Multiparametric imaging of the spleen following ischemia-reperfusion and permanent LAD occlusion.** (a)  $^{18}\text{F}$ -FLT PET/CT was performed 2 days after IR/PO surgery;  $^{18}\text{F}$ -FLT was injected 90 minutes prior the scan. (b) Quantification of  $^{18}\text{F}$ -FLT signal in the spleen and representative  $^{18}\text{F}$ -FLT PET/CT images ( $p = 0.15$  ctrl. vs. IR;  $p = 0.12$  ctrl. vs. PO;  $p = 0.97$  IR vs. PO). (c) *Ex vivo* gamma counting of  $^{18}\text{F}$ -FLT uptake in the spleen ( $n = 8-9$ ,  $p = 0.14$  ctrl. vs. IR;  $p = 0.042$  ctrl. vs. PO;  $p = 0.62$  IR vs. PO, Kruskal-Wallis test). (d)  $^{18}\text{F}$ -FDG PET/CT was performed 2 days after IR/PO surgery.  $^{18}\text{F}$ -FDG was injected 30 minutes before imaging. (e) Quantification of  $^{18}\text{F}$ -FDG signal in the spleen and representative  $^{18}\text{F}$ -FDG PET/CT images. (f) *Ex vivo* gamma counting of  $^{18}\text{F}$ -FDG uptake in the spleen. Both showing no significant differences. (g)  $^{19}\text{F}$ -MRI of the spleen 2 days after IR/PO surgery and 1 day after PERFECTA nanotracer injection. (h) Quantification of fluorine uptake in the spleen, expressed as target-to-background ratio ( $n = 6-8$ ,  $p = 0.58$  ctr. vs. IR;  $p = 0.004$  ctrl. vs. PO;  $p = 0.015$  IR vs. PO, Kruskal-Wallis test), and representative fused  $^{19}\text{F}$ -MR images. (i)  $^{89}\text{Zr}$ -CD11b nanobody PET/CT was performed 3 days after IR/PO surgery. The nanobody was injected 2 days after surgery. (j) Quantification of  $^{89}\text{Zr}$ -CD11b nanobody signal in the spleen ( $n = 5-8$ ,  $p = 0.020$  ctrl. vs. IR;  $p = 0.54$  ctr. vs. PO;  $p = 0.13$  IR vs. PO, Kruskal-Wallis test) and representative  $^{89}\text{Zr}$ -CD11b nanobody PET/CT images. (k) *Ex vivo* gamma counting of  $^{89}\text{Zr}$ -CD11b nanobody uptake in the spleen ( $n = 6-8$ ,  $p = 0.041$  ctrl. vs. IR;  $p = 0.046$  ctrl. vs. PO;  $p = 0.96$  IR vs. PO, Kruskal-Wallis test). (l)  $^{64}\text{Cu}$ -DOTA-ECL1i PET/CT of the spleen was performed 2 days after IR/PO surgery, during the first 60 minutes after injection. (m) Quantification of CCR2 tracer signal in the spleen and representative  $^{64}\text{Cu}$ -DOTA-ECL1i PET/CT images. (n) *Ex vivo* gamma counting of CCR2 tracer uptake the spleen ( $n = 7$ ,  $p = 0.039$  ctrl. vs. IR;  $p = 0.039$  ctrl. vs. PO;  $p > 0.99$  IR vs. PO, Kruskal-Wallis test). Data are presented as mean  $\pm$  standard error of mean, unless otherwise specified. Symbols used are specified as \* $p < 0.05$ , \*\* $p < 0.01$  and \*\*\* $p < 0.001$ .

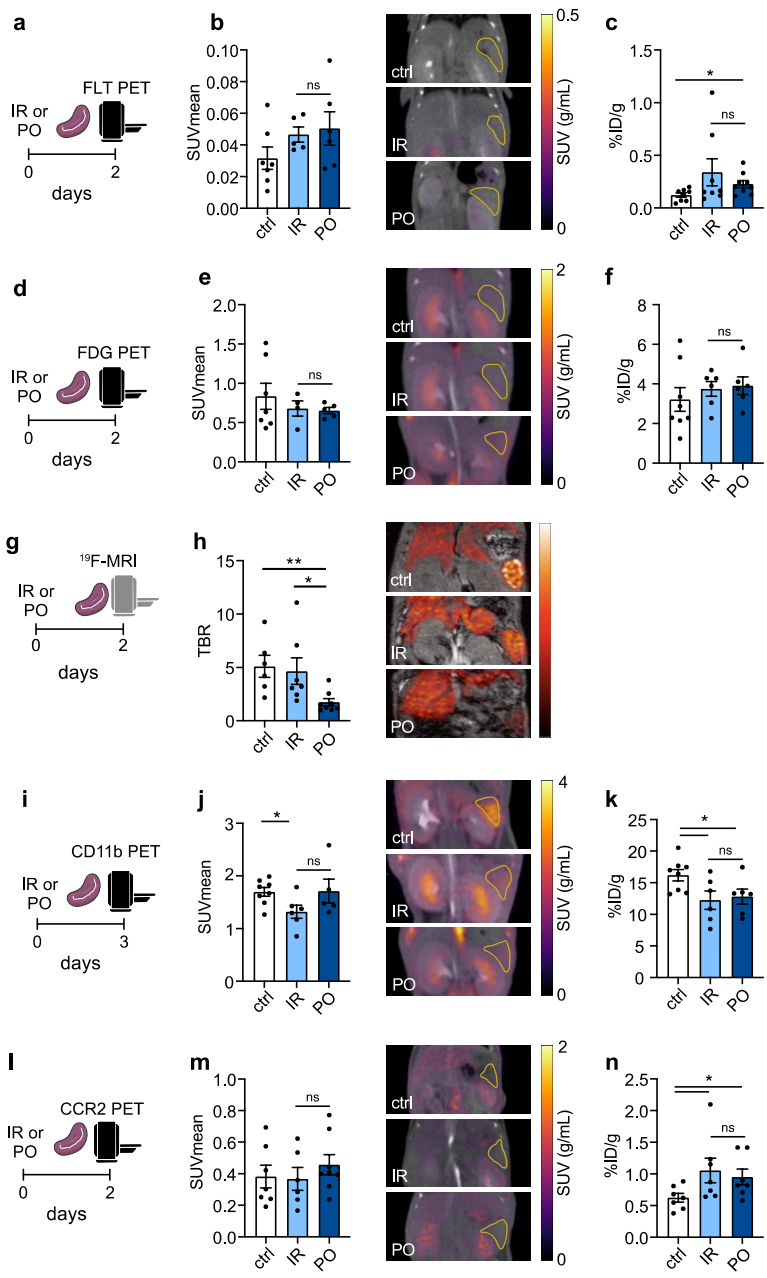

### Supplemental Figure 6. Correlations between tracer uptake in tissues of interest.

Spearman's correlations between tracer uptake in the infarct, spleen and/or bone marrow. For  $^{19}\text{F}$ -MRI, *in vivo* target-to-background ratios were used. For the PET tracers, *ex vivo* gamma counting data were used.

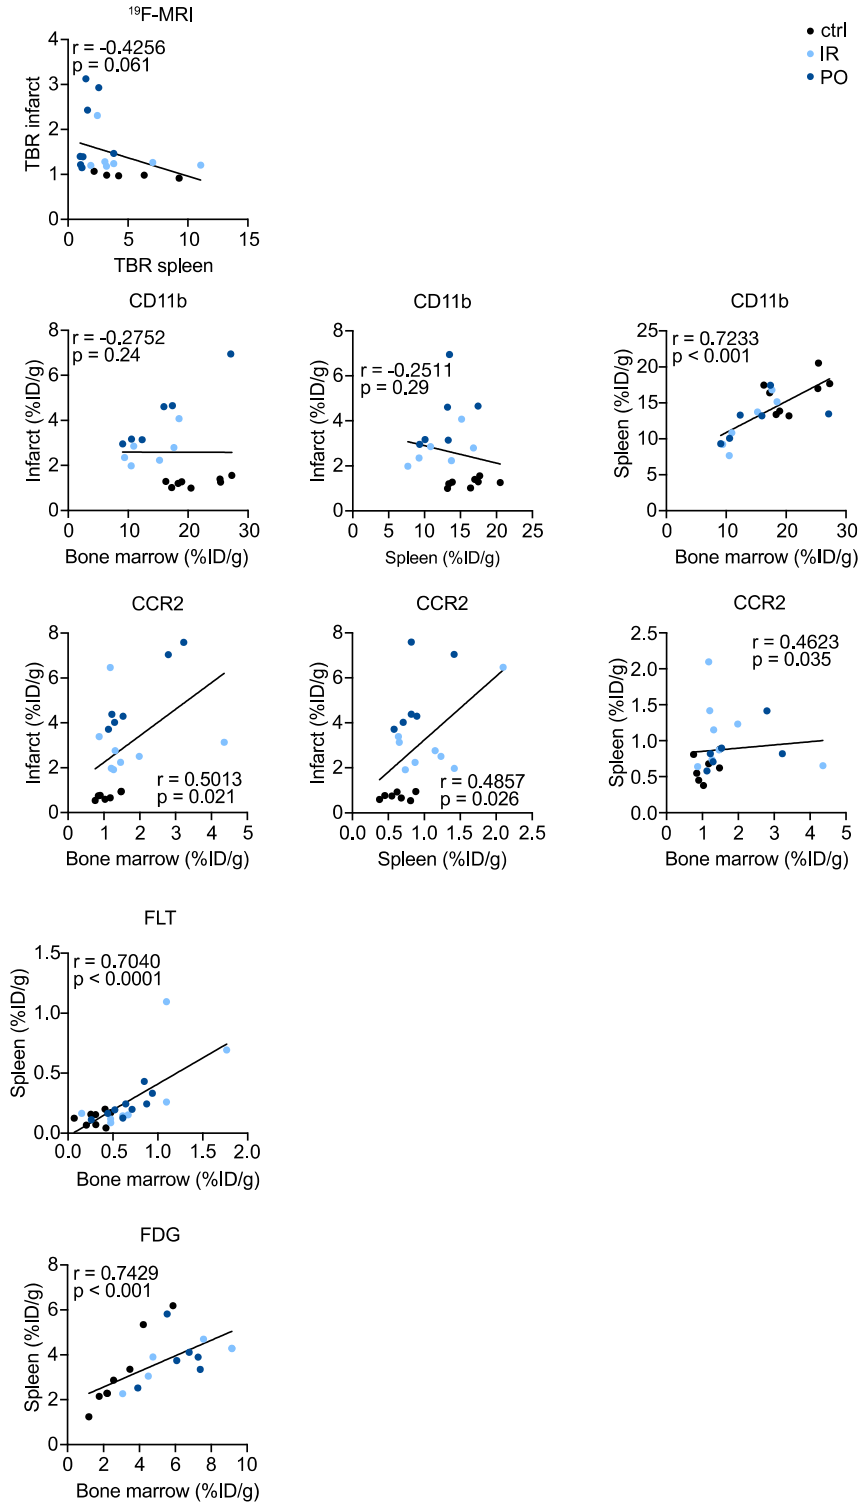

**Supplemental Figure 7. Myeloid cell numbers by flow cytometry of the blood, spleen, and bone marrow 7 days after IR/PO.** (a) Blood. CD11b<sup>+</sup>/Ly6G<sup>-</sup> cells (n = 9-12, p = 0.012 ctrl. vs. IR; p < 0.001 ctrl. vs. PO; p = 0.046 IR vs. PO, one-way ANOVA), Neutrophils (n = 9-12, p = 0.008 ctrl. vs. IR; p = 0.002 ctrl. vs. PO; p = 0.47 IR vs. PO, one-way ANOVA), Ly6C<sup>hi</sup> monocytes (n = 9-12, p = 0.072 ctrl. vs. IR; p = 0.005 ctrl. vs. PO; p = 0.20 IR vs. PO, one-way ANOVA) and Ly6C<sup>lo</sup> monocytes (n = 9-12, p = 0.010 ctrl. vs. IR; p = 0.016 ctrl. vs. PO; p = 0.90 IR vs. PO, Kruskal-Wallis test). (b) Spleen. CD11b<sup>+</sup>/Ly6G<sup>-</sup> cells (n = 9-12, p = 0.007 ctrl. vs. IR; p = 0.008 ctrl. vs. PO; p = 0.92 IR vs. PO, one-way ANOVA), Neutrophils (n = 9-12, p = 0.005 ctrl. vs. IR; p = 0.17 ctrl. vs. PO; p = 0.13 IR vs. PO, Kruskal-Wallis test), Ly6C<sup>hi</sup> monocytes (n = 9-12, p < 0.001 ctrl. vs. IR; p = 0.001 ctrl. vs. PO; p = 0.73 IR vs. PO, one-way ANOVA) and Ly6C<sup>lo</sup> monocytes (n = 9-12, p = 0.004 ctrl. vs. IR; p = 0.16 ctrl. vs. PO; p = 0.074 IR vs. PO, one-way ANOVA). (c) Bone marrow. CD11b<sup>+</sup>/Ly6G<sup>-</sup> cells (n = 9-12, p = 0.39 ctrl. vs. IR; p = 0.36 ctrl. vs. PO; p = 0.95 IR vs. PO, one-way ANOVA), Neutrophils (n = 9-12, p = 0.25 ctrl. vs. IR; p = 0.35 ctrl. vs. PO; p = 0.82 IR vs. PO, Kruskal-Wallis test), Ly6C<sup>hi</sup> monocytes (n = 9-12, p = 0.059 ctrl. vs. IR; p = 0.46 ctrl. vs. PO; p = 0.20 IR vs. PO, one-way ANOVA) and Ly6C<sup>lo</sup> monocytes (n = 9-12, p = 0.37 ctrl. vs. IR; p = 0.12 ctrl. vs. PO; p = 0.45 IR vs. PO, one-way ANOVA). Data are presented as mean ± standard error of mean, unless otherwise specified. Symbols used are specified as \*p < 0.05, \*\*p < 0.01 and \*\*\*p < 0.001.

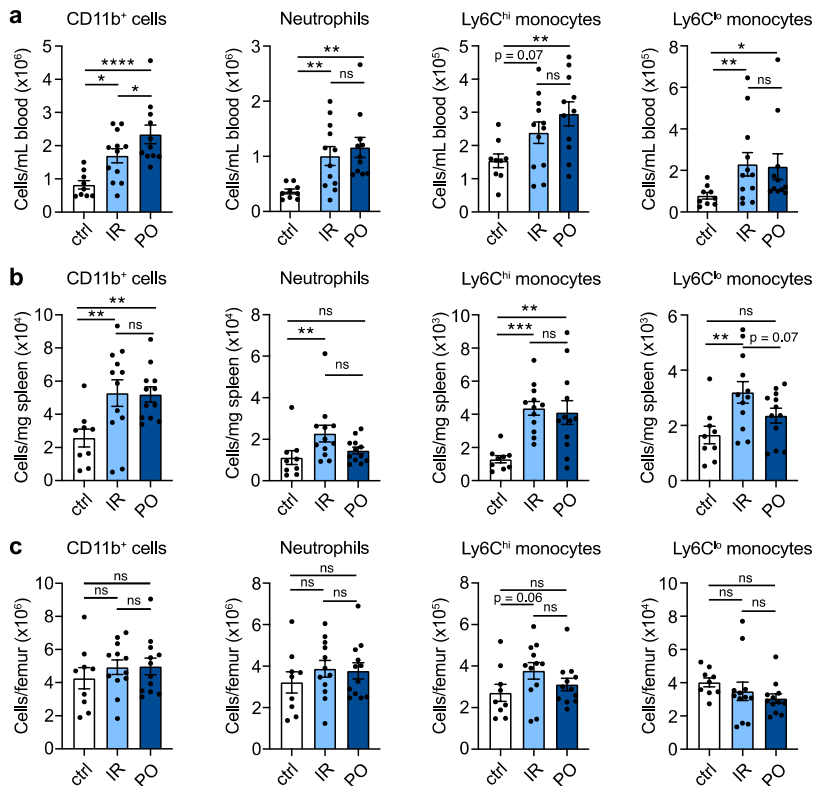



**Supplemental Figure 8. Myeloid cell numbers in the bone marrow, spleen, and aorta of *Apoe*<sup>-/-</sup> mice 4 weeks after IR/PO.** (a) Flow cytometry analysis of CD11b<sup>+</sup>/Ly6G<sup>-</sup> cells and neutrophils in the femur and spleen (n = 6-9, p = 0.063 ctrl. vs. IR; p = 0.071 ctrl. vs. PO for spleen CD11b<sup>+</sup> cells, Kruskal-Wallis test) of *Apoe*<sup>-/-</sup> mice 4 weeks after IR/PO surgery. (b) CD11b<sup>+</sup>/Ly6G<sup>-</sup> (n = 6-9, p < 0.001 ctrl. vs. IR; p = 0.018 ctrl. vs. PO; p = 0.34 IR vs. PO, Kruskal-Wallis test) and neutrophil (n = 6-9, p = 0.002 ctrl. vs. IR; p = 0.044 ctrl. vs. PO; p = 0.45 IR vs. PO, Kruskal-Wallis test) counts from the aortas of *Apoe*<sup>-/-</sup> mice 4 weeks after IR/PO surgery. Data are presented as mean ± standard error of mean, unless otherwise specified. Symbols used are specified as \*p < 0.05, \*\*p < 0.01 and \*\*\*p < 0.001.

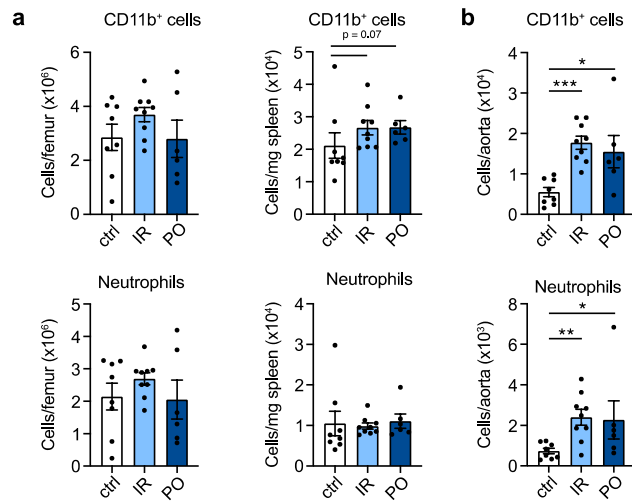

Supplement: mmc1.pdf [file mmc1.pdf]
